# Supplementary material for: I⋯N halogen bonding in 1 : 1 co-crystals formed between 1,4-diiodotetrafluorobenzene and the isomeric n-pyridinealdazines (n = 2, 3 and 4): assessment of supramolecular association and influence upon solid-state photoluminescence properties
Source: Royal Society of Chemistry journal article supplement (doi:10.1039/d2ce01165d), 2022-01-01
Supplement: d2ce01165d1.pdf [file d2ce01165d1.pdf]

**I···N Halogen bonding in 1:1 co-crystals formed between 1,4-diodotetrafluorobenzene and the isomeric n-pyridinealdazines (n = 2, 3 and 4): Assessment of supramolecular association and influence upon solid-state photoluminescence properties†**

Chien Ing Yeo,<sup>a</sup> Yee Seng Tan,<sup>a</sup> Huey Chong Kwong,<sup>a</sup> Vannajan Sanghiran Lee<sup>b</sup> and Edward R. T. Tiekink<sup>\*a</sup>

<sup>a</sup> Research Centre for Crystalline Materials, School of Medical and Life Sciences, Sunway University, 47500 Bandar Sunway, Selangor Darul Ehsan, Malaysia

<sup>b</sup> Department of Chemistry, University of Malaya, 50603 Kuala Lumpur, Malaysia

E-mail: [edwardt@sunway.edu.my](mailto:edwardt@sunway.edu.my) (ERTT)

**ELECTRONIC SUPPLEMENTARY MATERIAL**

**Table S1.** Selected geometric parameters (Å, °) in cocrystals **2–4**

| Parameter               | <b>2</b>      | <b>3</b>      | <b>4</b>              |
|-------------------------|---------------|---------------|-----------------------|
| I1···N1                 | 2.927(3)      | 2.856(2)      | 2.811(3)              |
| I2···N3                 | –             | –             | 2.836(3)              |
| C1–I1                   | 2.092(3)      | 2.094(3)      | 2.100(3)              |
| C4–I2                   | –             | –             | 2.096(4)              |
| C4–N1                   | 1.336(4)      | 1.339(4)      | –                     |
| C8–N1                   | 1.344(4)      | 1.340(4)      | –                     |
| C7–N1                   | –             | –             | 1.336(5)              |
| C11–N1                  | –             | –             | 1.338(5)              |
| C9–N2                   | 1.283(5)      | 1.280(4)      | –                     |
| C12–N2                  | –             | –             | 1.278(5)              |
| C13–N3                  | –             | –             | 1.342(5)              |
| C17–N3                  | –             | –             | 1.342(5)              |
| N2–N2 <sup>i</sup>      | 1.405(5)      | 1.408(5)      | 1.403(6)              |
| N4–N4 <sup>ii</sup>     | –             | –             | 1.410(6)              |
| C2–C1–I1                | 120.7(2)      | 122.6(2)      | 121.2(3)              |
| C3–C1–I1                | 122.1(3)      | 121.0(2)      | –                     |
| C6–C1–I1                | –             | –             | 121.8(2)              |
| C3–C4–I2                | –             | –             | 121.0(3)              |
| C5–C4–I2                | –             | –             | 120.7(3)              |
| C4–N1–C8                | 117.0(3)      | 117.2(3)      | –                     |
| C7–N1–C11               | –             | –             | 117.5(3)              |
| C13–N3–C17              | –             | –             | 117.3(3)              |
| C9–N2–N2 <sup>i</sup>   | 111.5(3)      | 111.5(3)      | –                     |
| C12–N2–N2 <sup>i</sup>  | –             | –             | 111.7(4)              |
| C18–N4–N4 <sup>ii</sup> | –             | –             | 111.6(4)              |
| Symmetry operations     |               |               |                       |
| i                       | 1-x, 1-y, 1-z | -1-x, -y, 1-z | -1/2-x, -1/2-y, 1/2-z |

ii

$1-x, 1-y, -z$

**Table S2.** The percentage contributions of interatomic contacts to the Hirshfeld surfaces of overall **2–4**, individual **1** in **2–4** and **n-PyAld** in **2–4**

| Contact     | <b>2</b> | <b>1</b> | <b>2-PyAld</b> | <b>3</b> | <b>1</b> | <b>3-PyAld</b> | <b>4</b> | <b>1</b> | <b>N1-4-PyAld</b> | <b>N3-4-PyAld</b> |
|-------------|----------|----------|----------------|----------|----------|----------------|----------|----------|-------------------|-------------------|
| H···H       | 15.0     | 0.0      | 24.8           | 12.3     | 0.0      | 20.7           | 16.3     | 0.0      | 21.3              | 20.2              |
| H···C/C···H | 13.8     | 9.3      | 14.8           | 11.1     | 6.0      | 14.1           | 14.8     | 3.2      | 17.5              | 18.5              |
| H···N/N···H | 4.1      | 0.0      | 6.8            | 5.3      | 0.0      | 9.0            | 12.1     | 0.0      | 15.1              | 16.3              |
| H···F/F···H | 24.6     | 28.4     | 18.9           | 26.9     | 30.9     | 21.3           | 23.9     | 29.7     | 19.0              | 20.0              |
| I···H/H···I | 10.9     | 21.9     | 7.8            | 13.1     | 22.4     | 8.6            | 9.4      | 24.6     | 8.1               | 6.8               |
| C···C       | 6.2      | 3.3      | 8.0            | 5.7      | 4.7      | 6.4            | 6.3      | 6.3      | 5.7               | 6.0               |
| C···N/N···C | 4.3      | 3.1      | 4.7            | 5.8      | 5.0      | 5.9            | 1.3      | 0.2      | 1.5               | 1.7               |
| C···F/F···C | 1.9      | 1.6      | 1.9            | 3.2      | 3.7      | 2.6            | 6.2      | 12.3     | 3.7               | 3.0               |
| C···I/I···C | 6.1      | 9.2      | 3.6            | 5.8      | 7.2      | 4.3            | 2.0      | 5.3      | 0.6               | 0.7               |
| N···F/F···N | 5.4      | 5.6      | 4.7            | 3.5      | 3.6      | 3.1            | 3.7      | 3.6      | 3.7               | 3.3               |
| N···I/I···N | 2.8      | 6.3      | 4.0            | 3.4      | 7.3      | 4.0            | 1.7      | 6.9      | 3.8               | 3.5               |
| F···F       | 2.4      | 5.2      | 0.0            | 3.0      | 6.5      | 0.0            | 0.1      | 0.2      | 0.0               | 0.0               |
| F···I/I···F | 2.5      | 6.1      | 0.0            | 0.9      | 2.7      | 0.0            | 1.3      | 4.7      | 0.0               | 0.0               |
| I···I       | 0.0      | 0.0      | 0.0            | 0.0      | 0.0      | 0.0            | 0.9      | 3.0      | 0.0               | 0.0               |

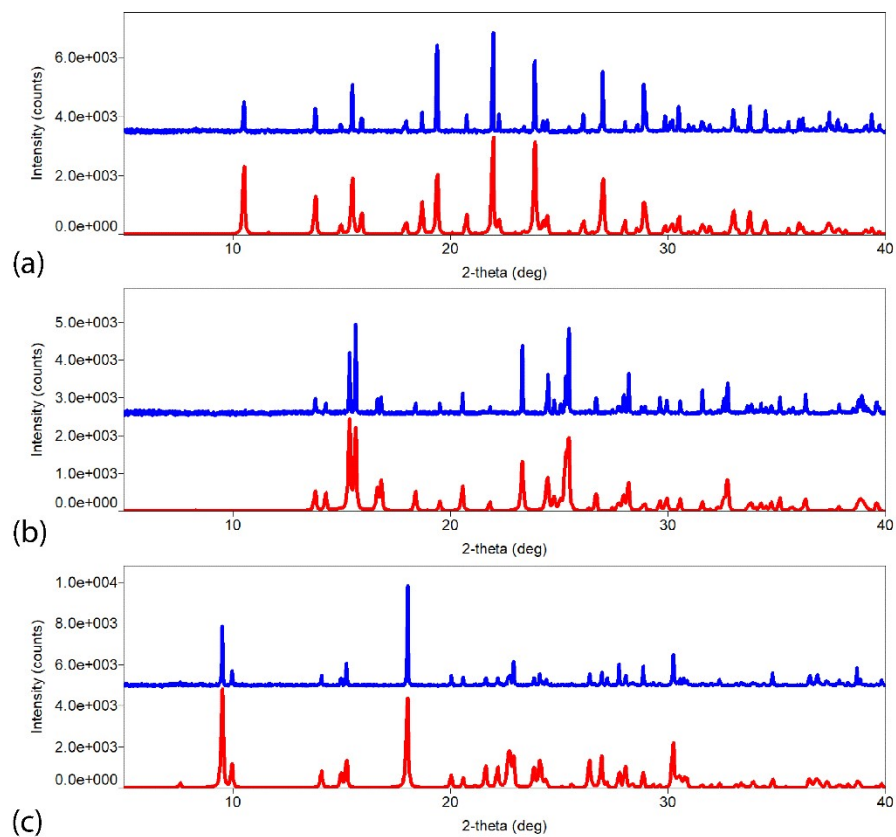

**Figure S1.** Experimental (blue trace) and simulated (red) powder X-ray diffraction patterns for (a) **2**, (b) **3** and (c) **4**, indicating matches between the single crystal results and structures of the bulk materials.

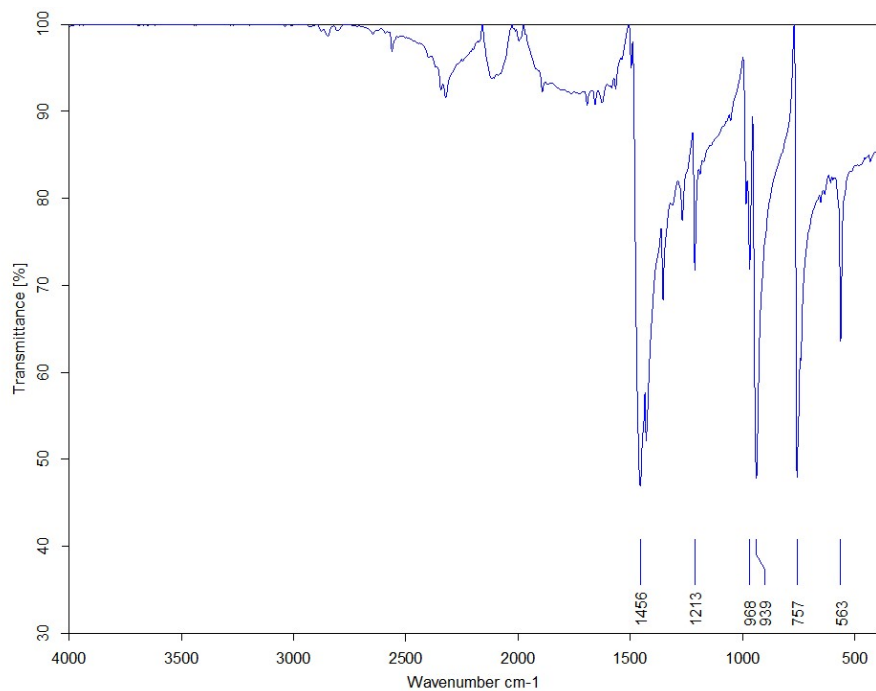

(a)

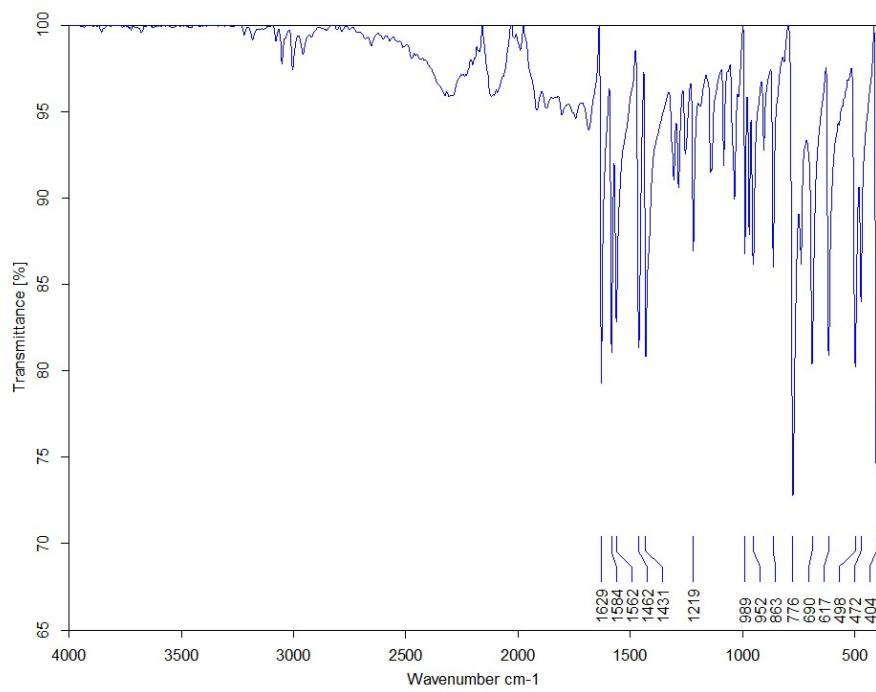

(b)

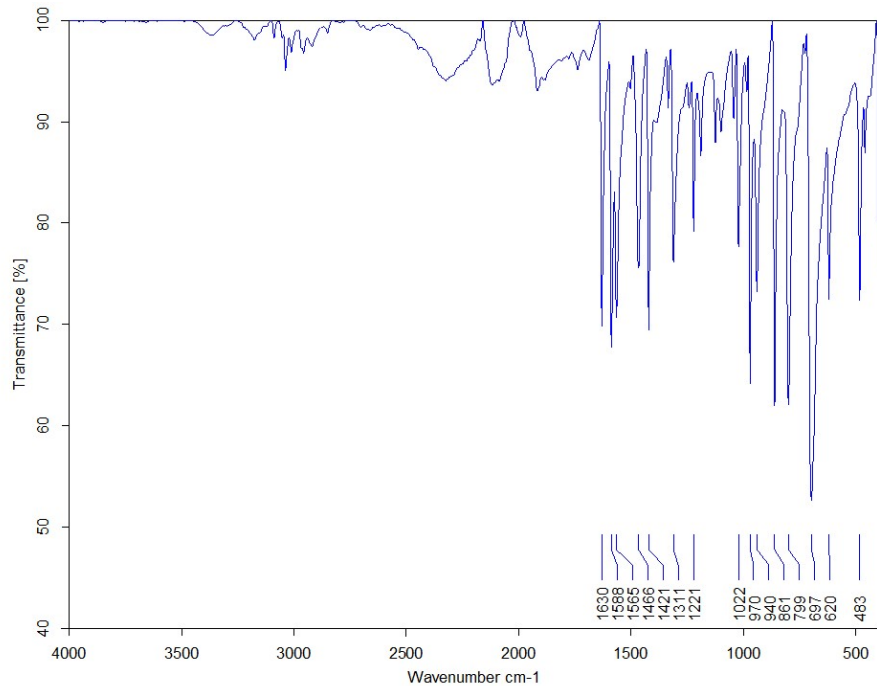

(c)

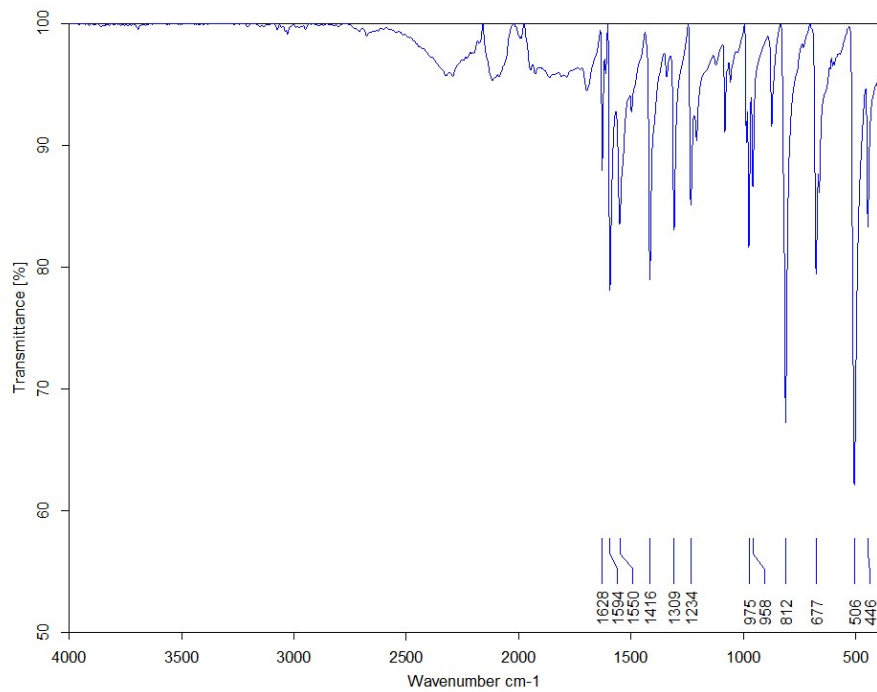

(d)

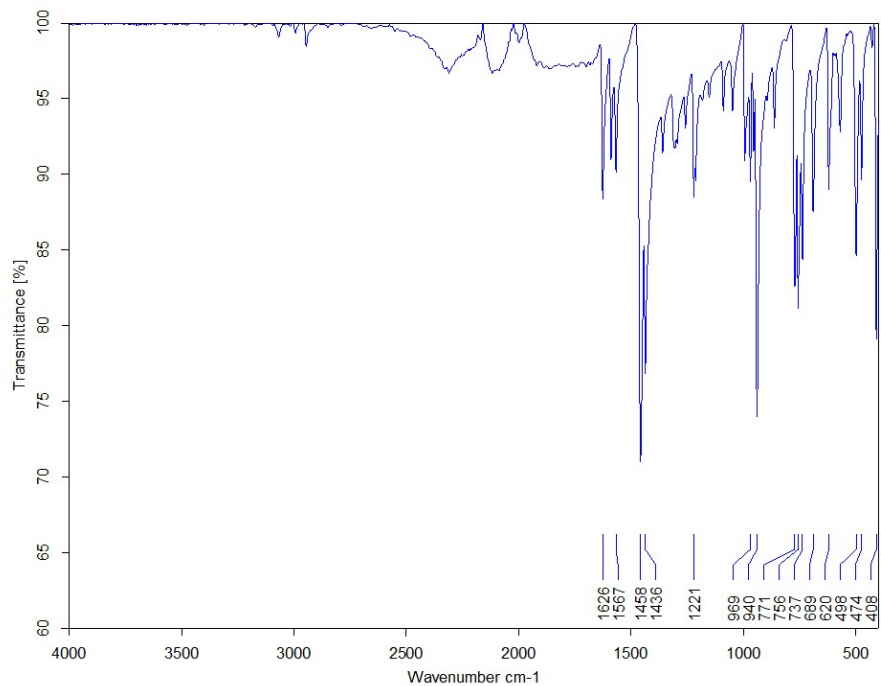

(e)

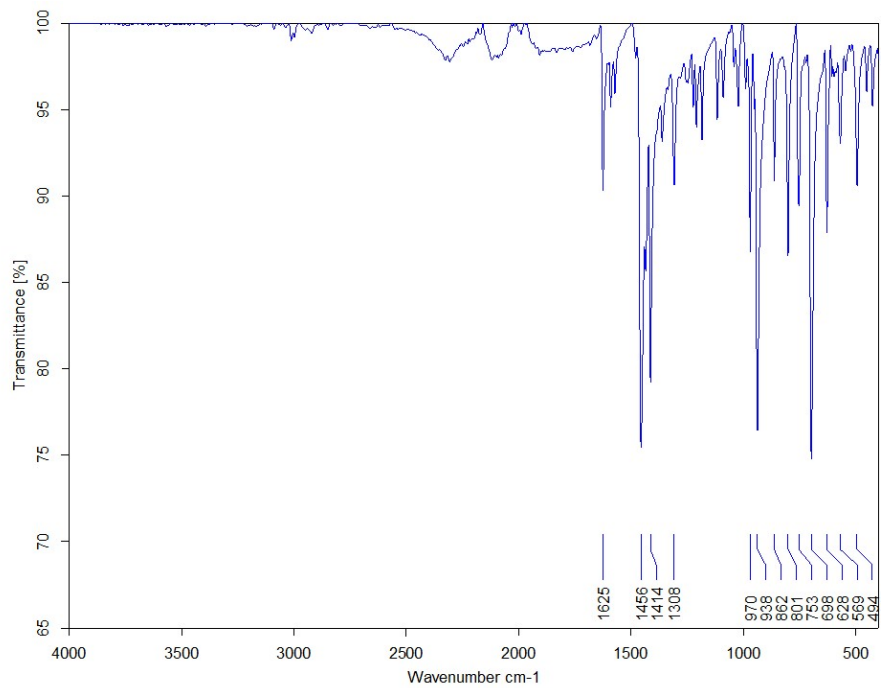

(f)



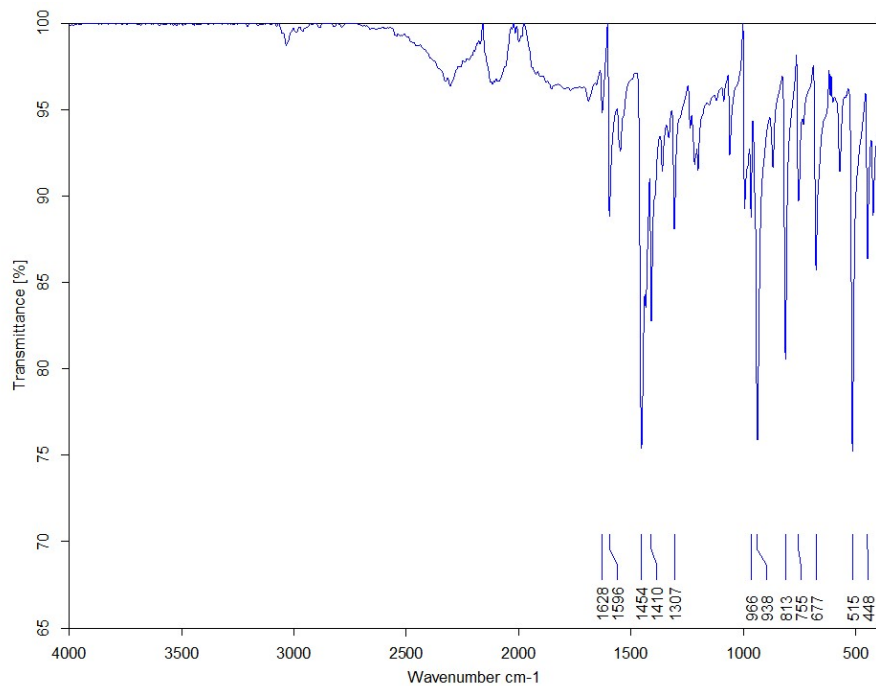

(g)

**Figure S2.** FTIR spectra for (a) **1**, (b) **2-PyAld**, (c) **3-PyAld**, (d) **4-PyAld**, (e) **2**, (f) **3** and (g) **4**.

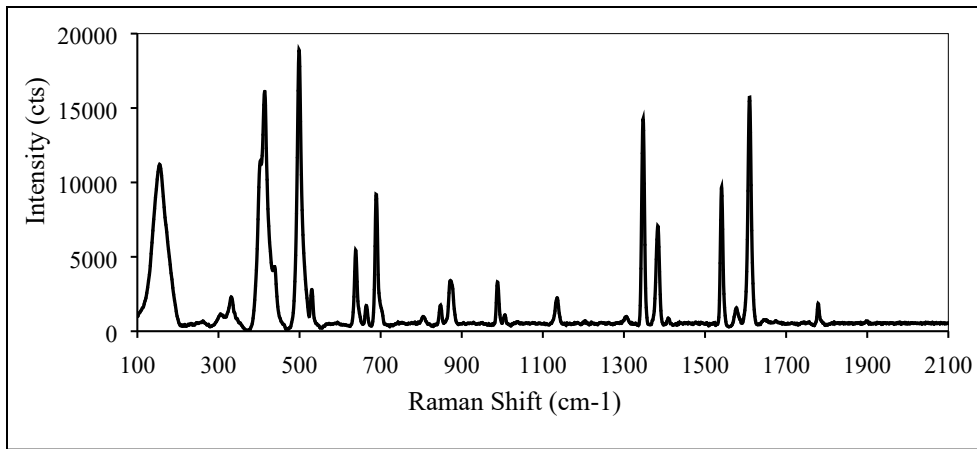

(a)

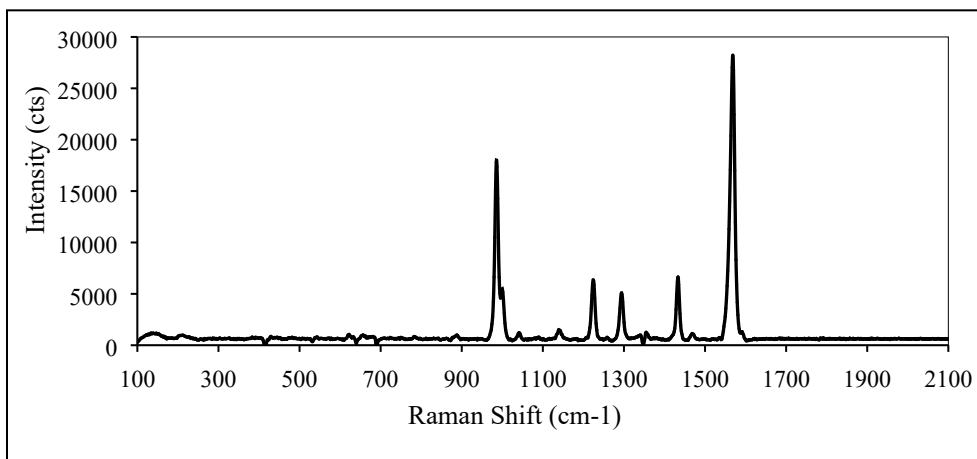

(b)

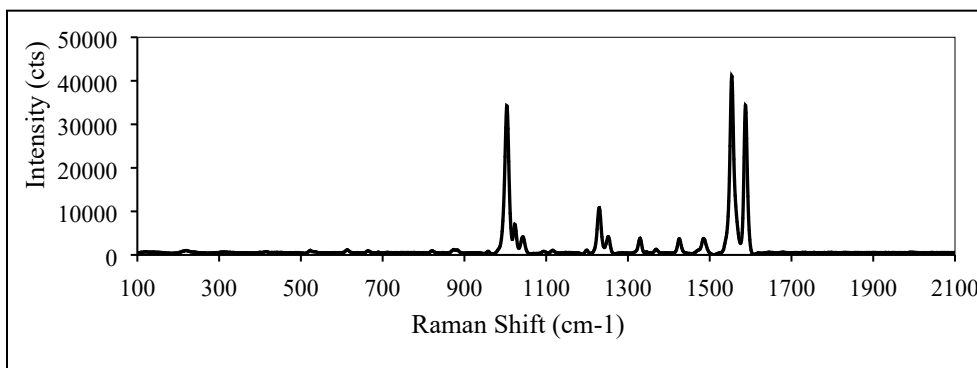

(c)

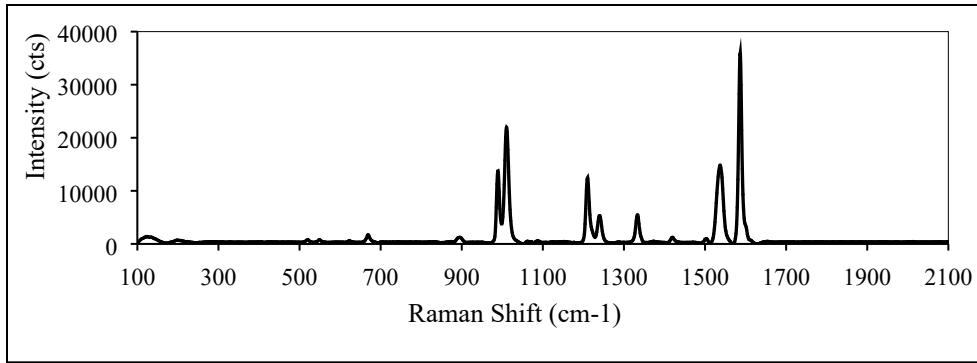

(d)

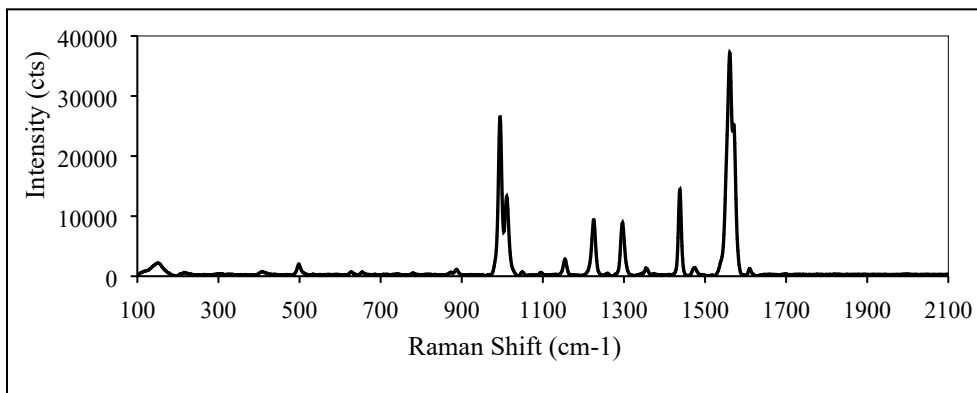

(e)

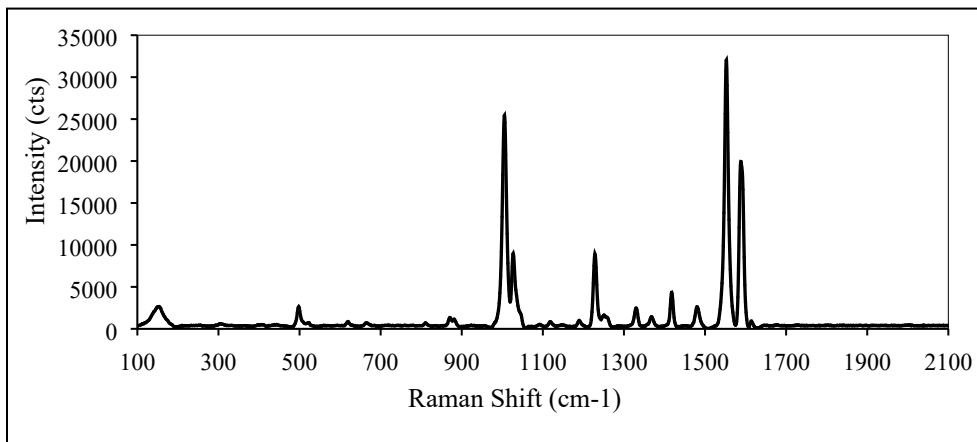

(f)

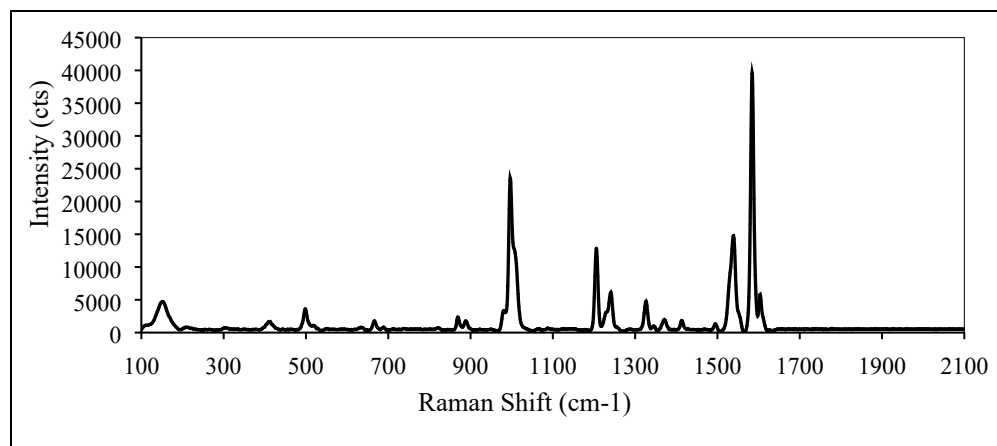

(g)

**Figure S3.** Raman spectra for (a) **1**, (b) **2-PyAld**, (c) **3-PyAld**, (d) **4-PyAld**, (e) **2**, (f) **3** and (g) **4**.

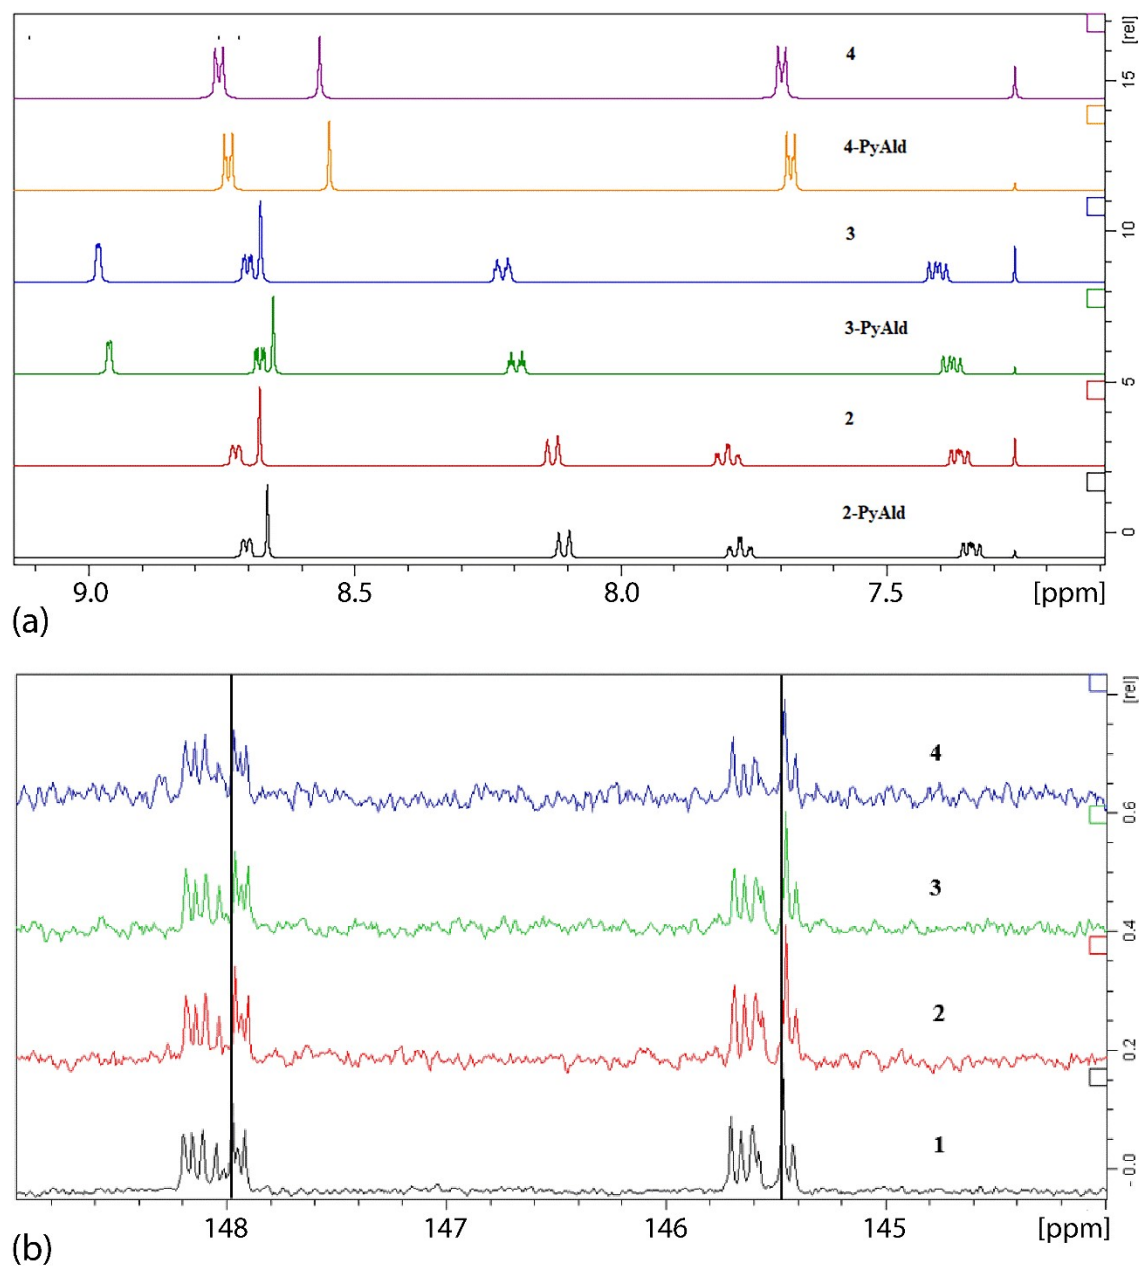

**Figure S4.** (a)  $^1\text{H}$  NMR spectra for 2–4 and n-PyAld ( $n = 2, 3$  and 4) and (b)  $^{13}\text{C}\{^1\text{H}\}$  NMR spectra for 1–4, recorded in 0.1 M  $\text{CDCl}_3$  solution. Downfield shifts are noted for the characteristic resonances ascribed to n-PyAld. Upfield shifts of approximately 0.02 ppm were noted for the  $^{13}\text{C}$  signals of 2–4 *cf.* 1 but no significant changes are observed for the  $^{13}\text{C}$  resonances due to the n-PyAld molecules.

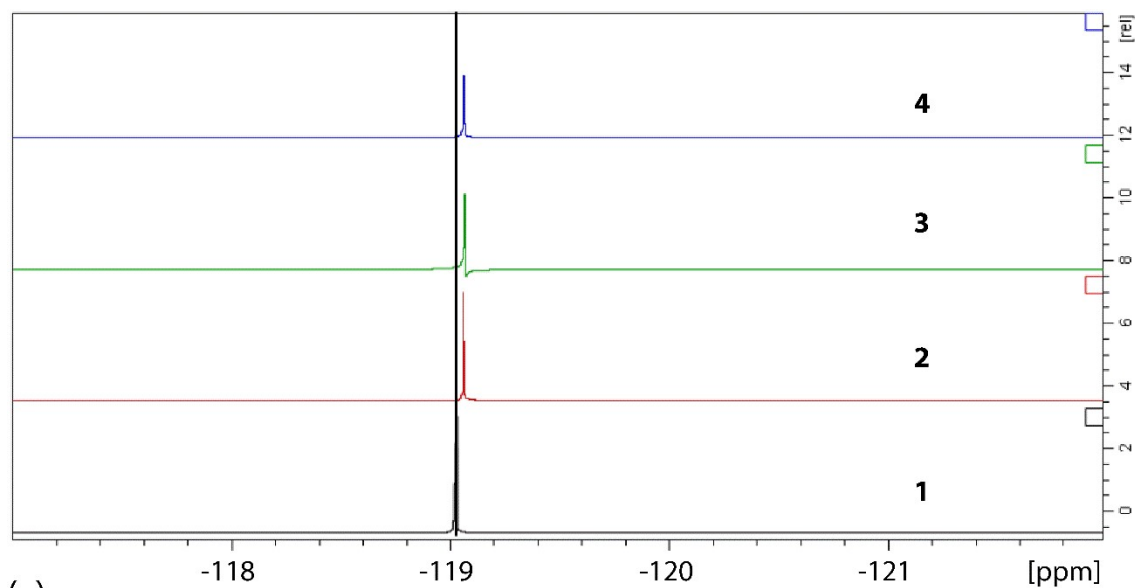

(a)

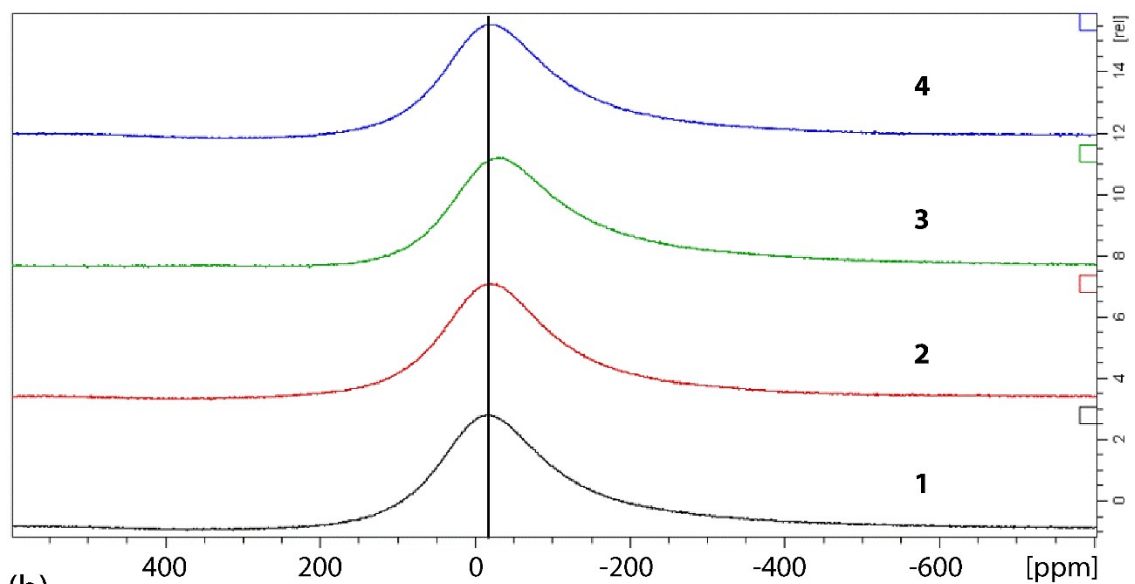

(b)

**Figure S5.** (a)  $^{19}\text{F}$  and (b)  $^{127}\text{I}$  NMR spectra recorded in 0.1 M  $\text{CDCl}_3$  solution for **1–4**. Upfield shifts were observed for the  $^{19}\text{F}$  and  $^{127}\text{I}$  signals of coformer **1** in **2–4**, respectively.

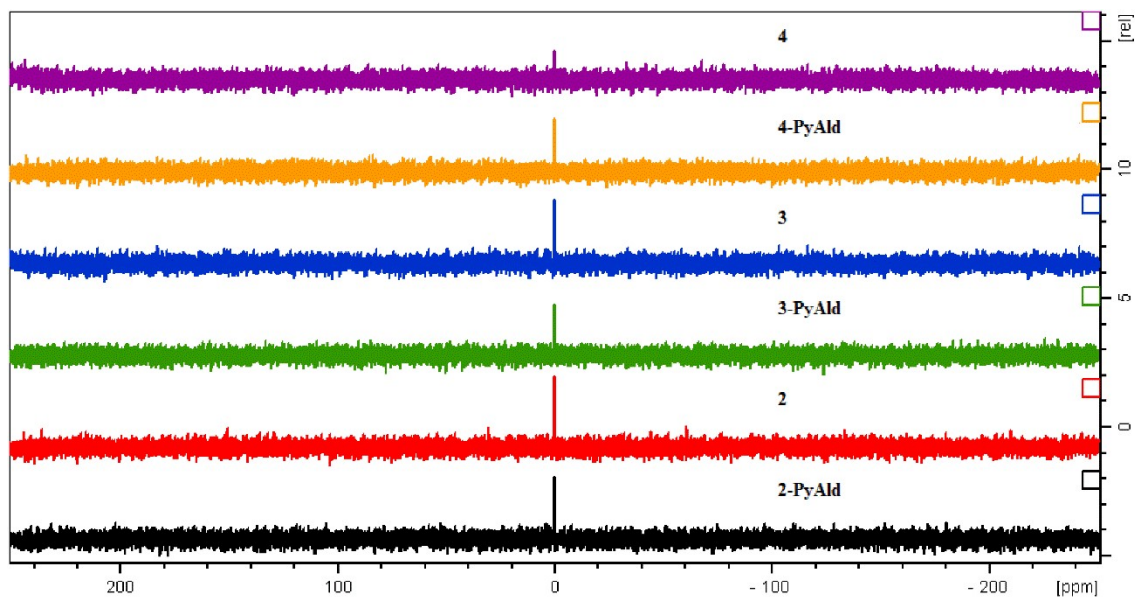

**Figure S6.**  $^{15}\text{N}$  NMR spectra for **2–4** and **n-PyAld** ( $n = 2, 3$  and  $4$ ) recorded in  $0.1\text{ M CDCl}_3$  solution. There are no visible changes observed in the  $^{15}\text{N}$  NMR spectra of **2–4** in comparison to the respective **n-PyAld** cofomers.

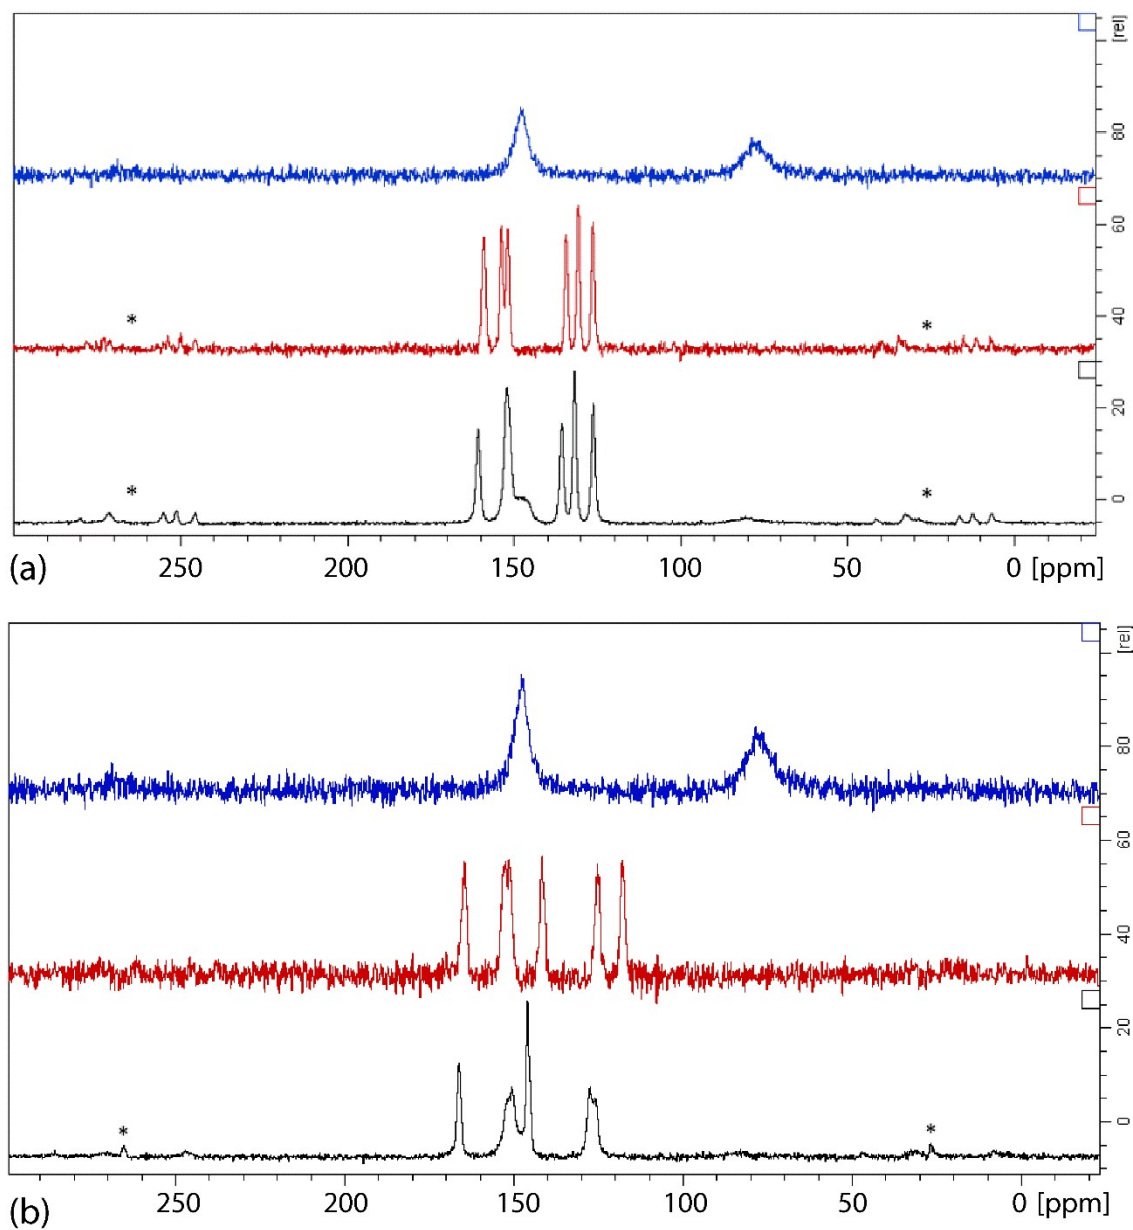

**Figure S7.** (a)  $^{13}\text{C}\{^1\text{H}\}$  SS NMR spectra of **1** (blue trace), **3**-PyAld (red) and **3** (black) measured at 12 kHz, and (b)  $^{13}\text{C}\{^1\text{H}\}$  SS NMR spectra for **1** (blue trace), **4**-PyAld (red) and **4** (black). Asterisks denote MAS spinning sidebands.
